# Supplementary material
Source: PubMed Central journal article supplement (PMC4564054)
Supplement: NIHMS720986-supplement-Supporting_tables_and_figures.pdf [file NIHMS720986-supplement-Supporting_tables_and_figures.pdf]

# Supporting Information

## Multifunctional Fe<sub>3</sub>O<sub>4</sub>@Polydopamine Core-Shell Nanocomposites for Intracellular mRNA Detection and Imaging-Guided Photothermal Therapy

*Li-Sen Lin,<sup>†</sup> Zhong-Xiao Cong,<sup>†</sup> Jian-Bo Cao,<sup>‡</sup> Kai-Mei Ke,<sup>†</sup> Qiao-Li Peng,<sup>‡</sup> Jinhao Gao,<sup>‡</sup>  
Huang-Hao Yang,<sup>†,\*</sup> Gang Liu,<sup>‡,\*</sup> and Xiaoyuan Chen<sup>§</sup>*

<sup>†</sup>The Key Lab of Analysis and Detection Technology for Food Safety of the MOE, College of Chemistry, Fuzhou University, Fuzhou 350108, China, <sup>‡</sup>State Key Laboratory of Molecular Vaccinology and Molecular Diagnostics & Center for Molecular Imaging and Translational Medicine, School of Public Health, Xiamen University, Xiamen 361005, China, and <sup>§</sup>Laboratory of Molecular Imaging and Nanomedicine (LOMIN), National Institute of Biomedical Imaging and Bioengineering (NIBIB), National Institutes of Health (NIH), Bethesda, Maryland 20892, United States

**Table S1.** The sequences employed in this work.

| Name                     | Sequence                                             |
|--------------------------|------------------------------------------------------|
| FAM-hpDNA                | 5'- <u>CCGGGTTTGGTGAAGCTAACGTTGAGGACCCGG</u> -FAM-3' |
| c-myc target             | 5'-CCUCAACGUUAGCUUCACCAA-3'                          |
| non-complementary target | 5'-CAAGGAGCUGGAAGGCUGGGA-3'                          |
| Cy3-hpDNA                | 5'- <u>CCGGGTGCGAGTGTCTTTGGCATACTTACCCGG</u> -Cy3-3' |

Underline denotes base pairs in the stem.

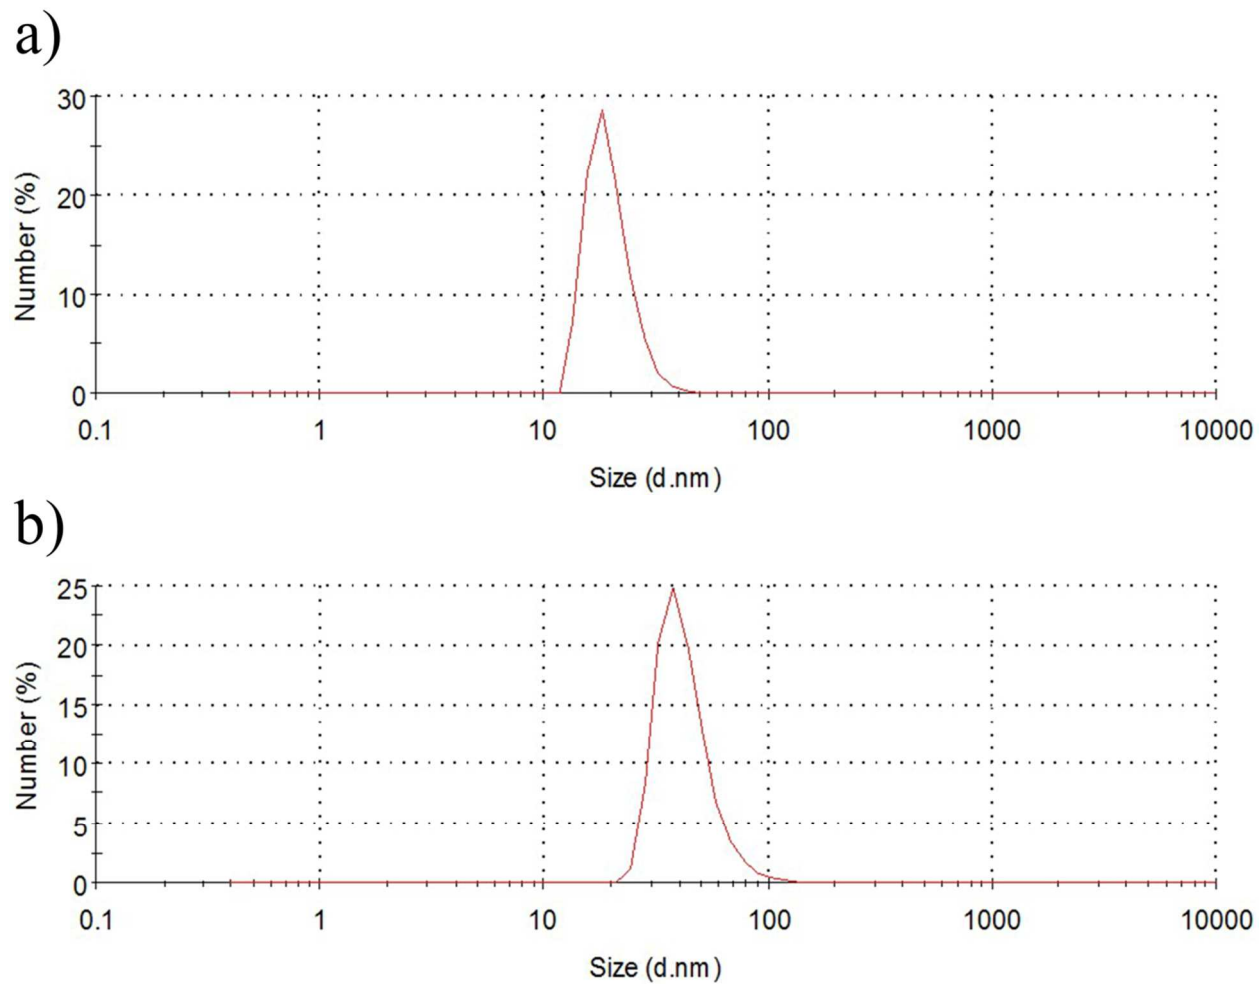

**Figure S1.** Dynamic light scattering (DLS) data of (a)  $\text{Fe}_3\text{O}_4$  NPs and (b)  $\text{Fe}_3\text{O}_4$ @PDA NCs in water.

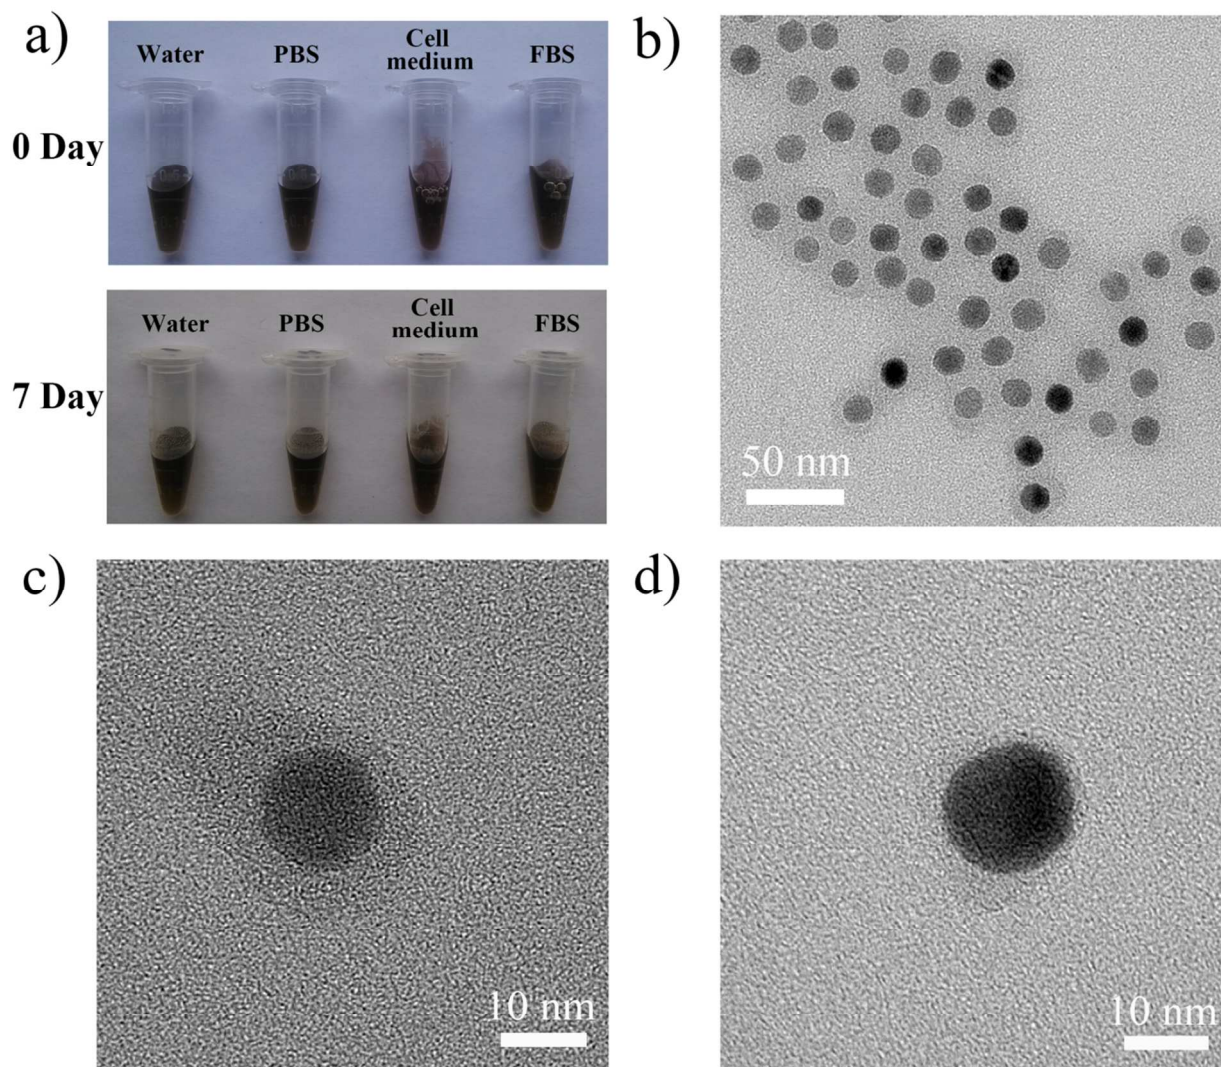

**Figure S2.** (a) Photos of Fe<sub>3</sub>O<sub>4</sub>@PDA NCs in different solutions including water, PBS, RPMI-1640 with 10% fetal bovine serum (FBS) cell culture medium, and FBS. The Fe<sub>3</sub>O<sub>4</sub>@PDA NCs were stable in those solutions for at least one week without showing obvious aggregation. (b,c,d) TEM images of the Fe<sub>3</sub>O<sub>4</sub>@PDA NCs prepared with different polymerization time: 4 h (b,c) and 1 h (d).

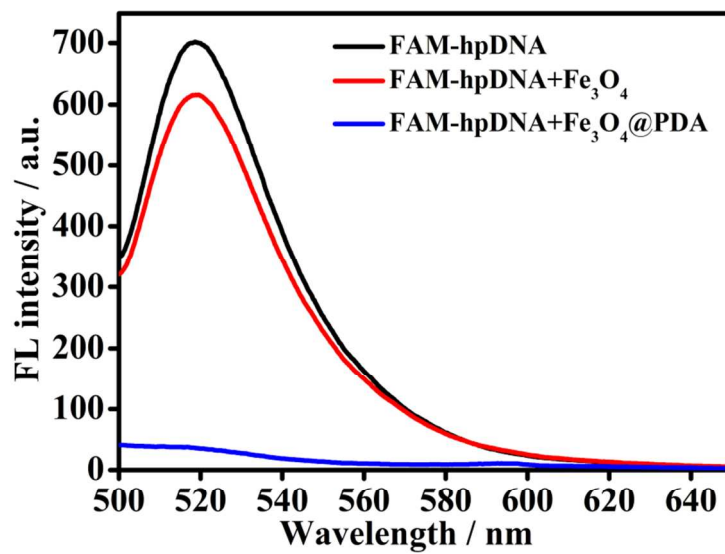

**Figure S3.** Fluorescence quenching of 50 nM FAM-hpDNA in the presence of Fe<sub>3</sub>O<sub>4</sub> NPs or Fe<sub>3</sub>O<sub>4</sub>@PDA NCs. Excitation: 480 nm, emission: 520 nm.

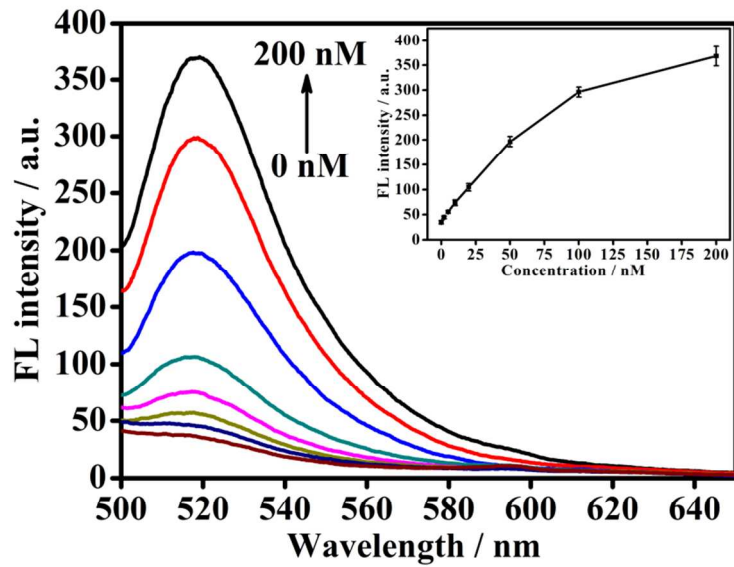

**Figure S4.** Fluorescence emission spectra of Fe<sub>3</sub>O<sub>4</sub>@PDA-DNA nanoprobe treated with various concentrations of RNA target (0, 2, 5, 10, 20, 50, 100 and 200 nM). Excitation: 480 nm, emission: 520 nm.

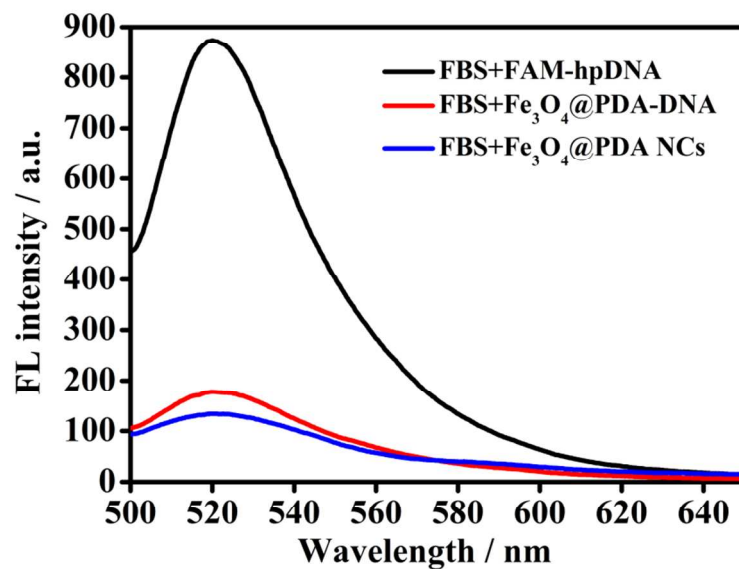

**Figure S5.** Fluorescence emission spectra of 50 nM FAM-hpDNA or Fe<sub>3</sub>O<sub>4</sub>@PDA-DNA nanoprobe (containing 50 nM FAM-hpDNA) dispersed in FBS. Excitation: 480 nm, emission: 520 nm.

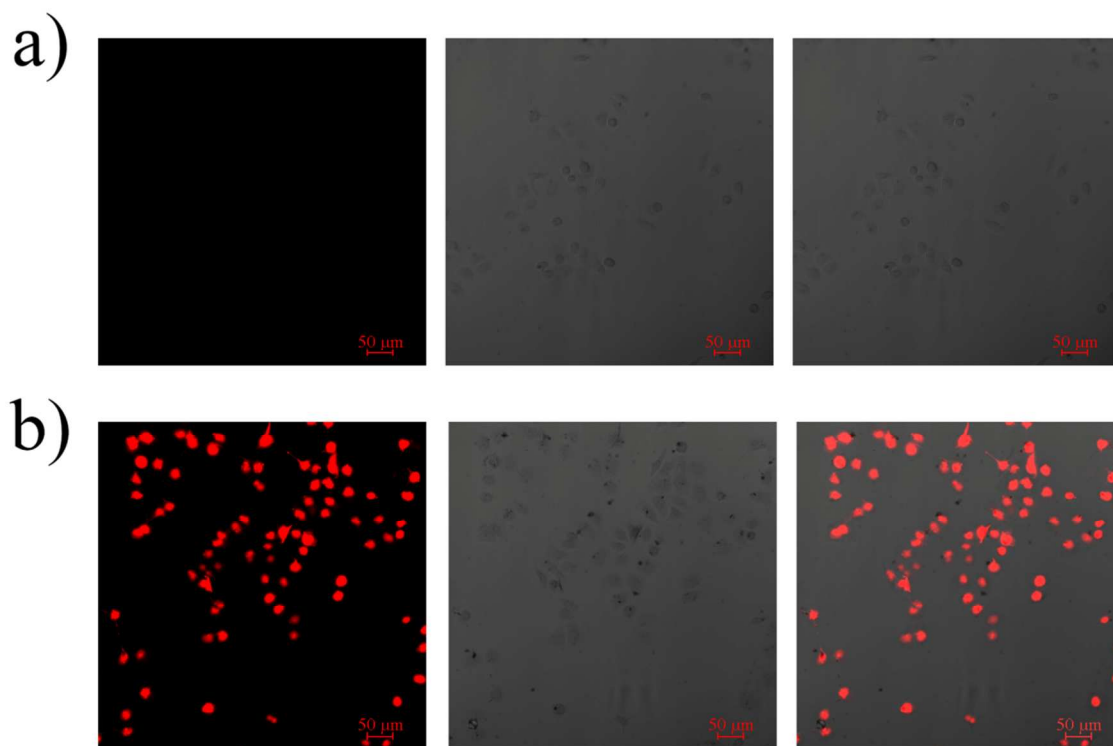

**Figure S6.** Propidium iodide (PI) stained CLSM images of MCF-7 cells incubated with  $0.1 \text{ mg mL}^{-1}$   $\text{Fe}_3\text{O}_4$  NPs (a) or  $\text{Fe}_3\text{O}_4@PDA$  NCs (b) after laser irradiation for 5 min. Left panels are PI fluorescence corresponding to dead cells, center panels are bright field image of cells, and right panels are the overlay of PI fluorescence and the bright field image. Scale bars are  $50 \mu\text{m}$ .



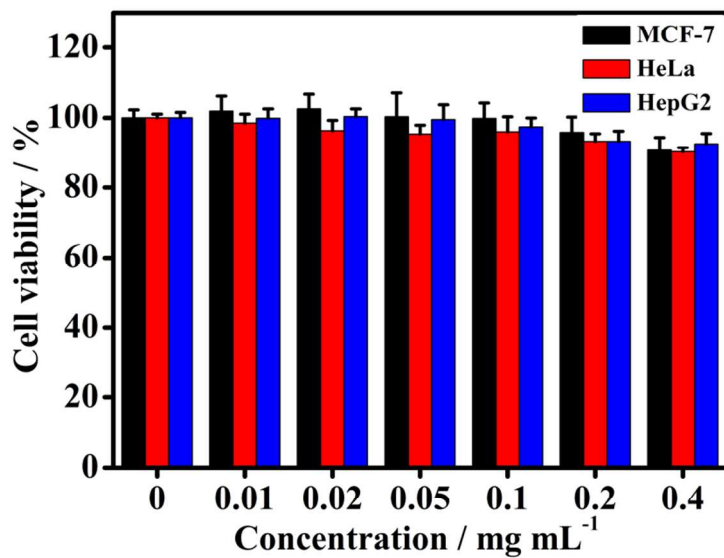

**Figure S7.** Cell viability of MCF-7, HeLa, and HepG2 cells incubated with different concentrations of Fe<sub>3</sub>O<sub>4</sub>@PDA NCs for 24 h.
